# Supplementary material for: ACE2-Independent Interaction of SARS-CoV-2 Spike Protein with Human Epithelial Cells Is Inhibited by Unfractionated Heparin
Source: MDPI journal article supplement (doi:10.3390/cells10061419), 2021-06-07
Supplement: s1 [file s1]

# Supporting information

**Supplementary Table S1. Primer Sequences**

| Primer          | Sequence (5'-3')         |
|-----------------|--------------------------|
| ACE2 Forward    | GGGATCAGAGATCGGAAGAAGAAA |
| ACE2 Reverse    | AGGAGGTCTGAACATCATCAGTG  |
| TMPRSS2 Forward | TAGTGTCCCCAGCCTACCTC     |
| TMPRSS2 Reverse | GCACCAAGGGCACTGTCTAT     |
| GAPDH Forward   | TGCACCACCAACTGCTTAGC     |
| GAPDH Reverse   | GGCATGGACTGTGGTCATGAG    |

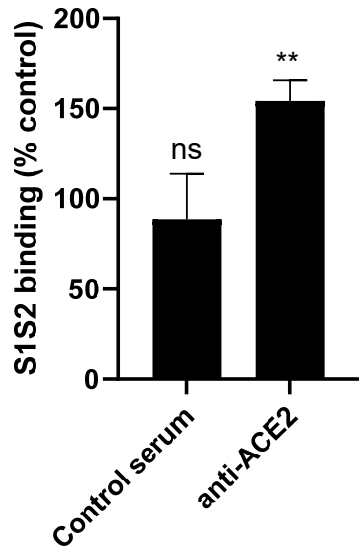

**Supplementary Figure S1. wtS1S2 binding to RT4 cells is not inhibited by anti-hACE2 antibody.** RT4 cells were incubated with 10ug/ml anti-human ACE2 monoclonal antibody for 30 min at 37°C, then with 33nM wtS1S2 for a further 60 min at 37°C. After a further 60 min at 37°C, cells were washed and fluorescent secondary anti-His6 antibody added for a further 30 min at 21°C. Cell-associated fluorescence was measured by flow cytometry and are shown as a percentage of the wtS1S2 attachment to untreated control cells. Data are means +/- SEM from 4 separate experiments performed in duplicate. The significance of the difference from 100 was assessed by a one sample t test; ns = not significant; \*\* p<0.001.

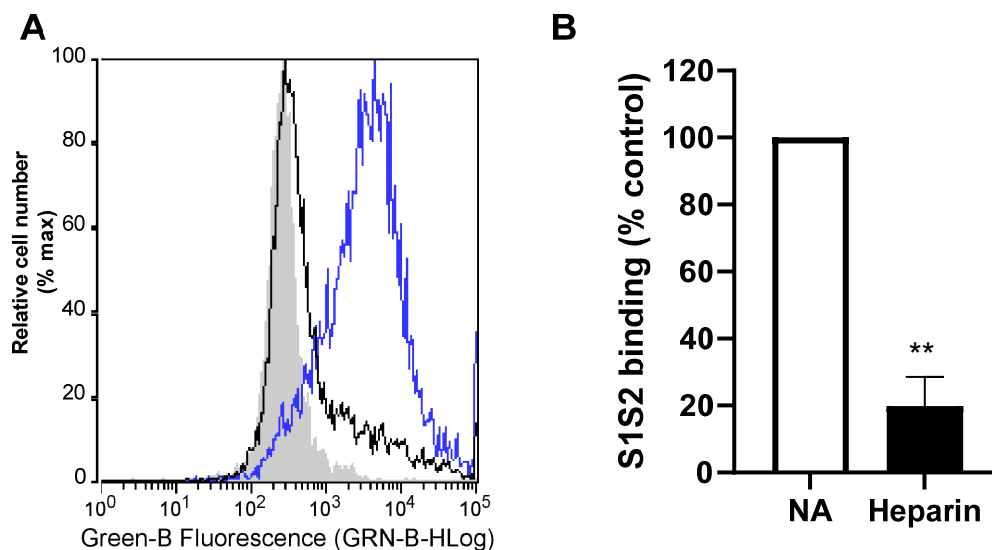

**Supplementary Figure S2. Unfractionated heparin inhibits wtS1S2 binding to RT4 cells.** RT4 cells were incubated with 10U/ml unfractionated heparin for 30 min at 37°C, then with 33nM wtS1S2 for a further 60 min at 37°C. After a further 60 min at 37°C, cells were washed and fluorescent secondary anti-His6 antibody added for a further 30 min at 21°C. Cell-associated fluorescence was measured by flow cytometry. A) representative histogram showing wtS1S2 binding to untreated cells (blue), heparin-treated cells (black) or secondary only control (solid grey). B) Mean  $\pm$  SEM from 3 separate experiments performed in duplicate, shown as a percentage of the wtS1S2 attachment to untreated control cells (NA). The significance of the difference from 100 was assessed by a one sample t test; \*\*  $p < 0.001$ .
